# Supplementary material
Source: ML conference proceedings conference paper supplement (https://openreview.net/forum?id=vKBdabh_WV)
Supplement: supplementary_material [file attachment]

## 483 A Selecting $\epsilon$ for MNIST

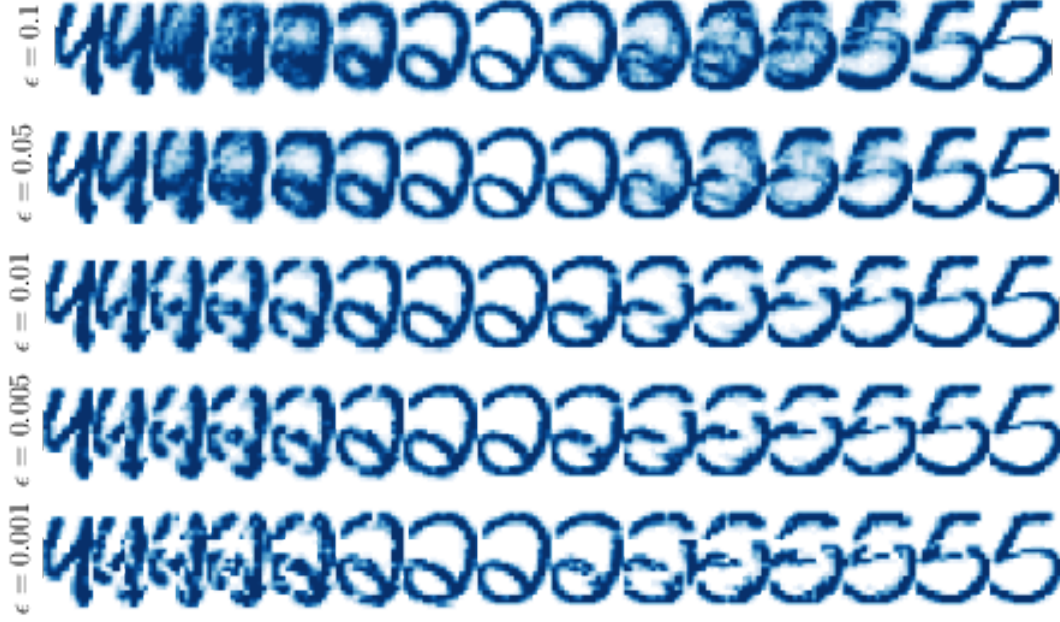

Figure 8: We selected  $\epsilon = 10^{-2}$  for our MNIST coupling experiments as it results in transport maps that are not too blurry or sharp.

## 484 B Other models for continuous OT

485 While developing the hyper-network or Meta ICNN in [sect. 3.2](#) for predicting couplings between  
 486 continuous measures, we considered alternative modeling formulations briefly documented in this  
 487 section. We finalized only the hyper-network model because it is conceptually the most similar to  
 488 predicting the optimal dual variables in the continuous setting and results in rapid predictions.

### 489 B.1 Optimization-based meta-learning (MAML-inspired)

490 The model-agnostic meta-learning setup proposed in MAML [[Finn et al., 2017](#)] could also be ap-  
 491 plied in the Meta OT setting to learn an adaptable initial parameterization. In the continuous setting,  
 492 one initial version would take a parameterized dual potential model  $\psi_\varphi(x)$  and seek to learn an ini-  
 493 tial parameterization  $\varphi_0$  so that optimizing a loss such as the W2GN loss  $\mathcal{L}$  from [eq. \(12\)](#) results in  
 494 a minimal  $\mathcal{L}(\varphi_K)$  after adapting the model for  $K$  steps. Formally, this would optimize:

$$\arg \min_{\varphi_0} \mathcal{L}(\varphi_K) \quad \text{where} \quad \varphi_{t+1} = \varphi_t - \nabla_{\varphi} \mathcal{L}(\varphi_t) \quad (18)$$

495 [Tancik et al. \[2021\]](#) explores similar learned initializations for coordinate-based neural implicit rep-  
 496 resentations for 2D images, CT scan reconstruction, and 3d shape and scene recovery from 2D  
 497 observations.

498 **Challenges for Meta OT.** The transport maps given by  $T = \nabla \psi$  can significantly vary depending on  
 499 the input measures  $\alpha, \beta$ . We found it difficult to learn an initialization that can be rapidly adapted,  
 500 and optimizing [eq. \(18\)](#) is more computationally expensive than [eq. \(17\)](#) as it requires unrolling  
 501 through many evaluations of the transport loss  $\mathcal{L}$ . And, we found that *only* learning to predict  
 502 the optimal parameters with [eq. \(17\)](#), conditional on the input measures, and then fine-tuning with  
 503 W2GN to be stable.

504 **Advantages for Meta OT.** Exploring MAML-inspired methods could further incorporate the knowl-  
 505 edge that the model’s prediction is going to be fine-tuned into the learning process. One promising

direction we did not try could be to integrate some of the ideas from LEO [Rusu et al., 2018] and CAVIA [Zintgraf et al., 2019], which propose learn a latent space for the parameters where the initialization is also conditional on the input.

## B.2 Neural process

The (conditional) neural process models considered in Garnelo et al. [2018b,a] can also be adapted for the Meta OT setting. In the continuous setting, this would result in a dual potential that is also conditioned on a representation of the input measures, e.g.  $\psi_\varphi(x; z)$  where  $z := f_\varphi^{\text{emb}}(\alpha, \beta)$  is a learned embedding of the input measures that is learned with the parameters of  $\psi$ . This could be formulated as

$$\arg \min_{\varphi} \mathbb{E}_{(\alpha, \beta) \sim \mathcal{D}} \mathcal{L}(\varphi, f_\varphi^{\text{emb}}(\alpha, \beta)), \quad (19)$$

where  $\mathcal{L}$  modifies the model used in the loss eq. (12) to also be conditioned on the context extracted from the measures.

**Challenges for Meta OT.** This raises the issue on best-formulating the model to be conditional on the context. One way could be to append  $z$  to the input point  $x$  in the domain, but if  $\psi$  is an input-convex neural network, then the model would only need to be convex with respect to  $x$  and not  $z$ .

**Advantages for Meta OT.** A large advantage is that the representation  $z$  of the measures  $\alpha, \beta$  would be significantly lower-dimensional than the parameters  $\varphi$  that our Meta OT models are predicting.

## C Additional experimental and implementation details

We have attached the Jax source code necessary to run and reproduce all of the experiments in our paper and will open-source all of it. Here is a basic overview of the files:

```

meta_ot  Meta OT Python library code
├── conjugate.py  Exact conjugate solver for the continuous setting
├── data.py
├── models.py
├── utils.py
├── config  Hydra configuration for the experiments (containing hyper-parameters)
├── train_discrete.py  Train Meta OT models for discrete OT
├── train_color_single.py  Train a single ICNN with W2GN between 2 images (for debugging)
├── train_color_meta.py  Train a Meta ICNN with W2GN
├── plot_mnist.py  Visualize the MNIST couplings
├── plot_world_pair.py  Visualize the spherical couplings
├── eval_color.py  Evaluate the Meta ICNN in the continuous setting
└── eval_discrete.py  Evaluate the Meta ICNN for the discrete tasks

```

526 Connecting to the data is one difficulty in running the experiments. The easiest experiment to re-run  
 527 is the MNIST one, which will automatically download the dataset:

```
528
529 1 ./train_discrete.py # Train the model, outputting to <exp_dir>
530 2 ./eval_discrete.py <exp_dir> # Evaluate the learned models
531 3 ./plot_mnist.py <exp_dir> # Produce further visualizations
```

533 We lastly summarize the hyper-parameters we used:

### 534 C.1 Hyper-parameters

535 Here we briefly summarize the hyper-parameters we used for training, which we did not extensively  
 536 tune. In the discrete setting, we use the same hyper-parameters for the MNIST and spherical settings.

Table 3: Discrete OT hyper-parameters.

|  | Name                          | Value              |
|--|-------------------------------|--------------------|
|  | Batch size                    | 128                |
|  | Number of training iterations | 50000              |
|  | MLP Hidden Sizes              | [1024, 1024, 1024] |
|  | Adam learning rate            | 1e-3               |

537

Table 4: Continuous OT hyper-parameters.

|  | Name                                          | Value          |
|--|-----------------------------------------------|----------------|
|  | Meta batch size (for $\alpha, \beta$ )        | 8              |
|  | Inner batch size (to estimate $\mathcal{L}$ ) | 1024           |
|  | Cycle loss weight ( $\gamma$ )                | 3.             |
|  | Adam learning rate                            | 1e-3           |
|  | $\ell_2$ weight penalty                       | 1e-6           |
|  | Max grad norm (for clipping)                  | 1.             |
|  | Number of training iterations                 | 200000         |
|  | Meta ICNN Encoder                             | ResNet18       |
|  | Encoder output size (both measures)           | $256 \times 2$ |
|  | Meta ICNN Decoder Hidden Sizes                | [512]          |

538 **D Additional color transfer results**

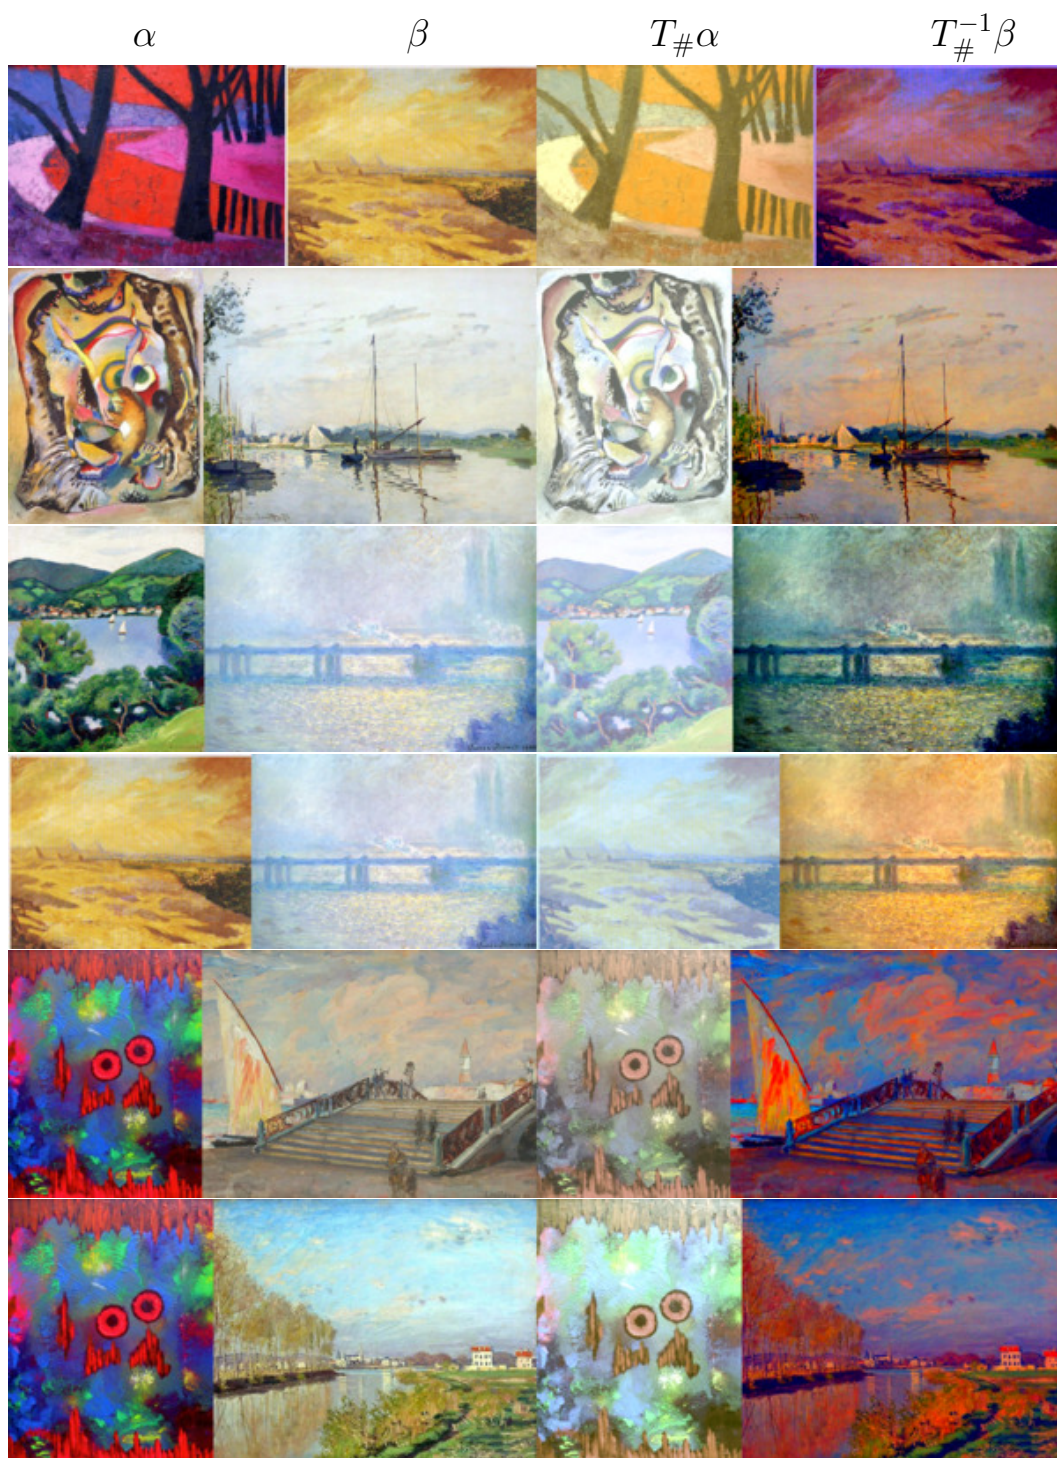

Figure 9: Meta ICNN (initial prediction)



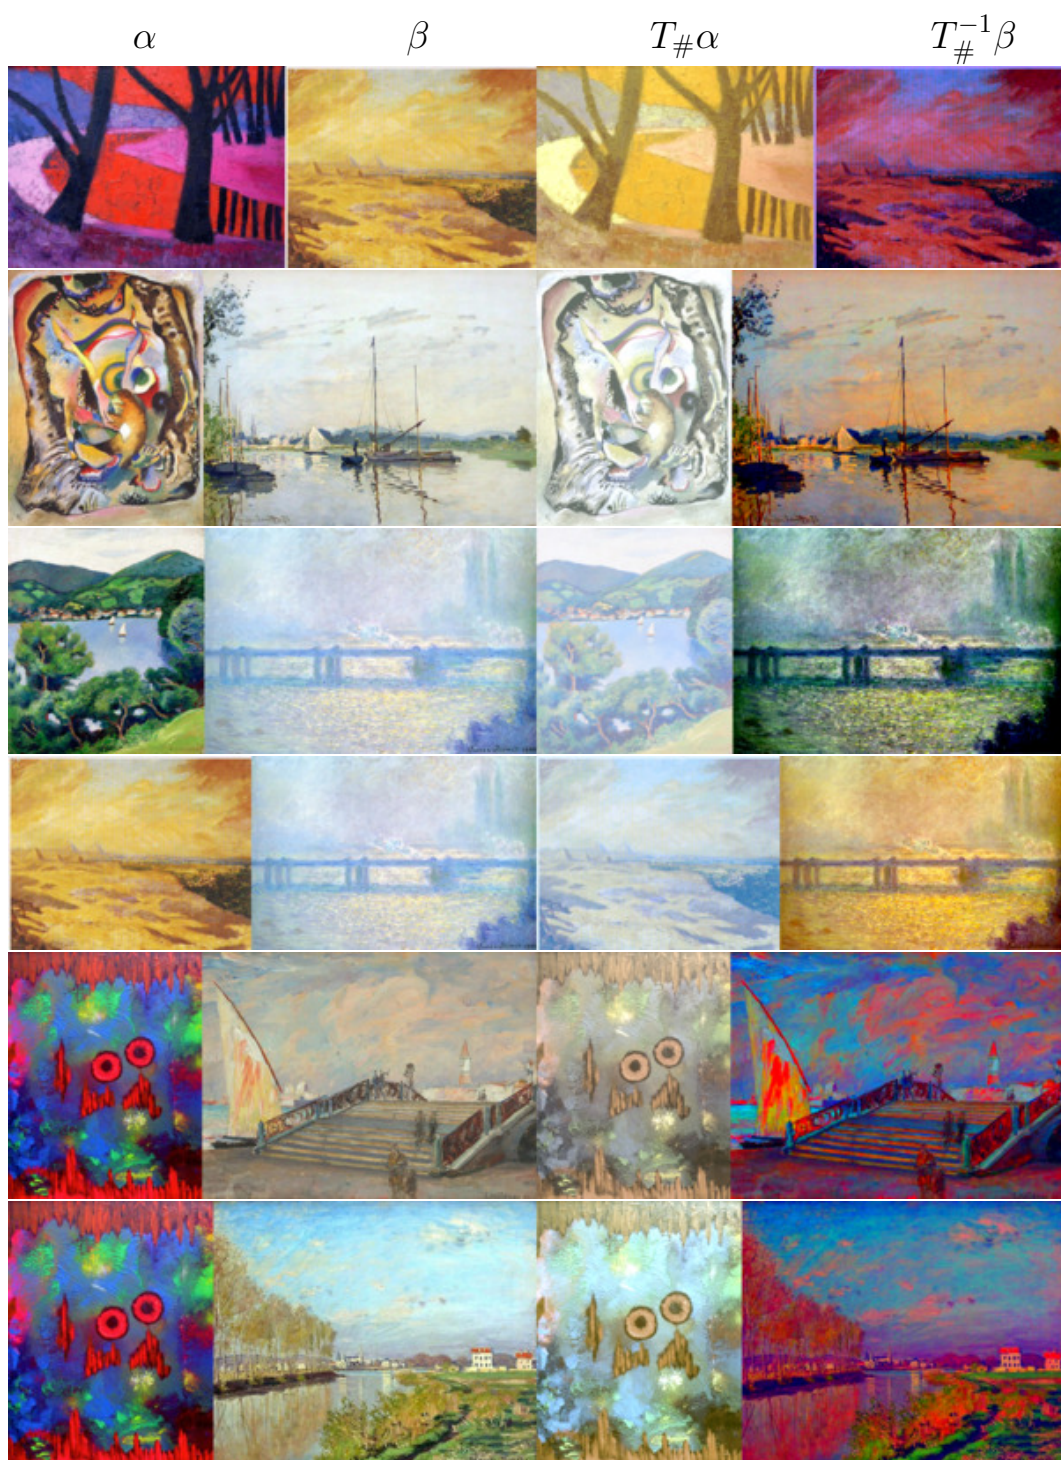

Figure 10: Meta ICNN + W2GN fine-tuning



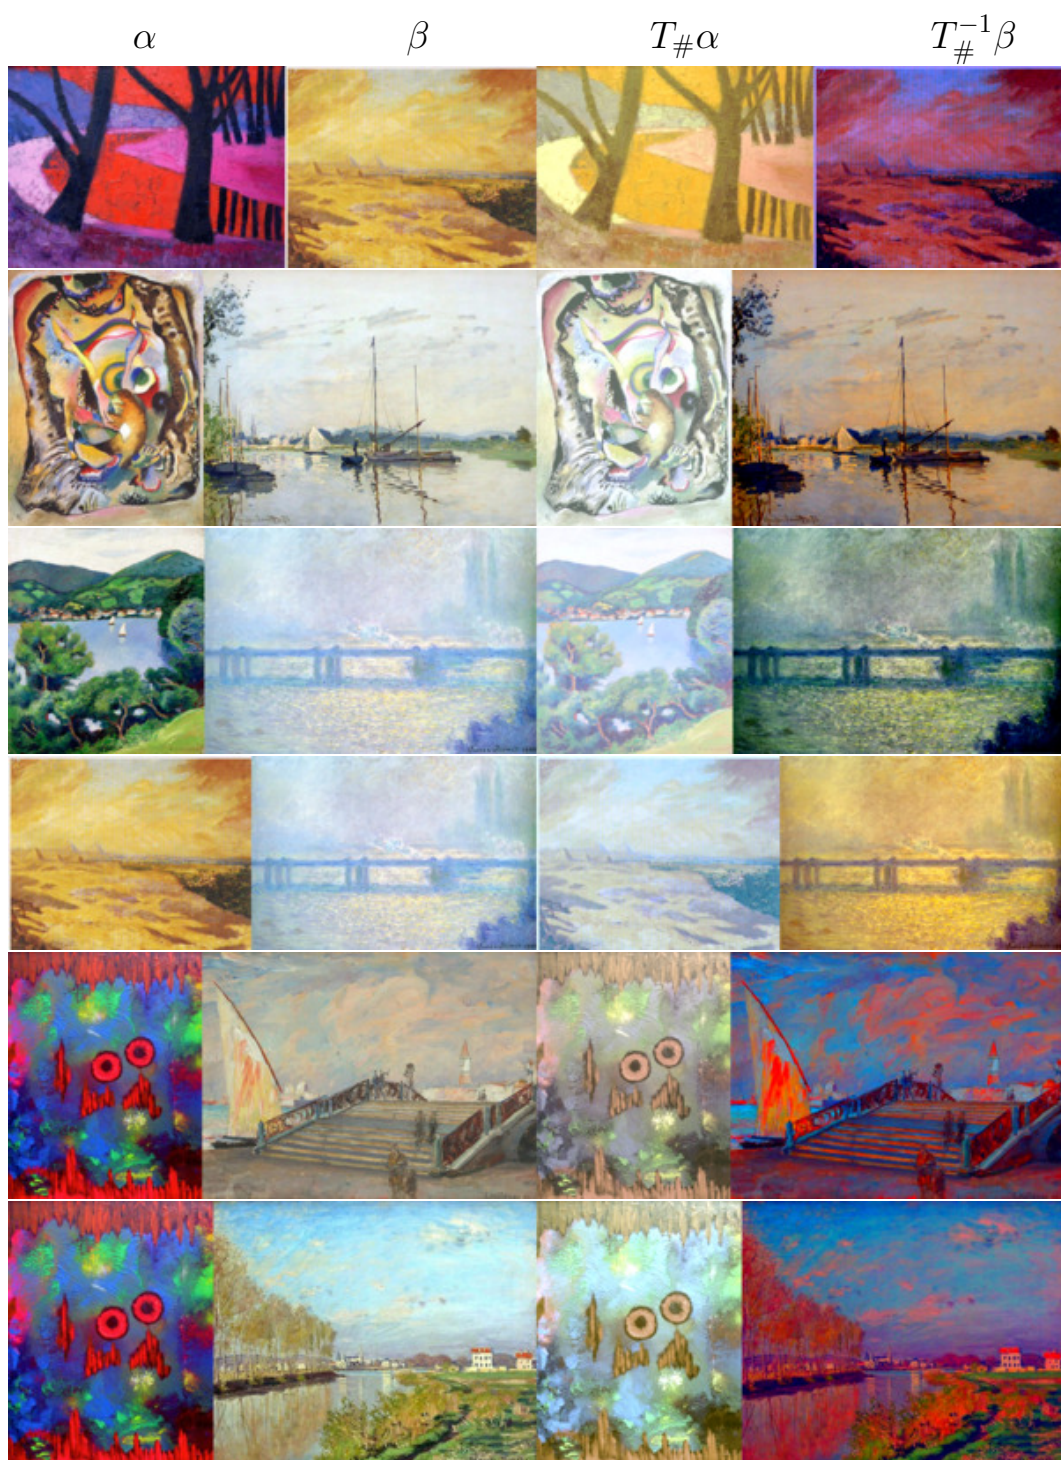

Figure 11: W2GN (final)
